# Supplementary material
Source: MDPI journal article supplement (https://www.mdpi.com/2073-4433/13/6/860)
Supplement: s1 [file s1 › atmosphere-1720563-supplementary.pdf]

# Supplementary Materials: Temporal Variation of NO<sub>2</sub> and HCHO Vertical Profiles Derived from MAX-DOAS Observation in Summer at a Rural Site of the North China Plain and Ozone Production in Relation to HCHO/NO<sub>2</sub> Ratio

Siyang Cheng <sup>1,2</sup>, Junli Jin <sup>3</sup>, Jianzhong Ma <sup>1,\*</sup>, Jinguang Lv <sup>2</sup>, Shuyin Liu <sup>1</sup> and Xiaobin Xu <sup>1</sup>

**Table S1.** Fit settings for the NO<sub>2</sub> and HCHO spectral analyses.

| Parameters                     | Setting                                                                                                      |
|--------------------------------|--------------------------------------------------------------------------------------------------------------|
| fitting interval               | 338–370 nm for NO <sub>2</sub> ; 324–359 nm for HCHO                                                         |
| DOAS polynomial                | degree: 5                                                                                                    |
| intensity offset               | degree: 2                                                                                                    |
| shift and stretch              | spectrum                                                                                                     |
| ring effect                    | original and wavelength-dependent ring spectra                                                               |
| NO <sub>2</sub> cross section  | Vandaele et al. (1998), 220K, 294K, I <sub>0</sub> correction (10 <sup>17</sup> molec•cm <sup>-2</sup> )     |
| H <sub>2</sub> O cross section | Polyansky et al. (2018), 293K                                                                                |
| O <sub>3</sub> cross section   | Serdyuchenko et al. (2014), 223K, 243K, I <sub>0</sub> correction (10 <sup>20</sup> molec•cm <sup>-2</sup> ) |
| O <sub>4</sub> cross section   | Thalman and Volkamer (2013), 293K                                                                            |
| HCHO cross section             | Meller and Moortgat (2000), 298K                                                                             |
| BrO cross section              | Wilmouth et al. (1999), 228K                                                                                 |
| HONO cross section             | Stutz et al. (2000), 296K                                                                                    |

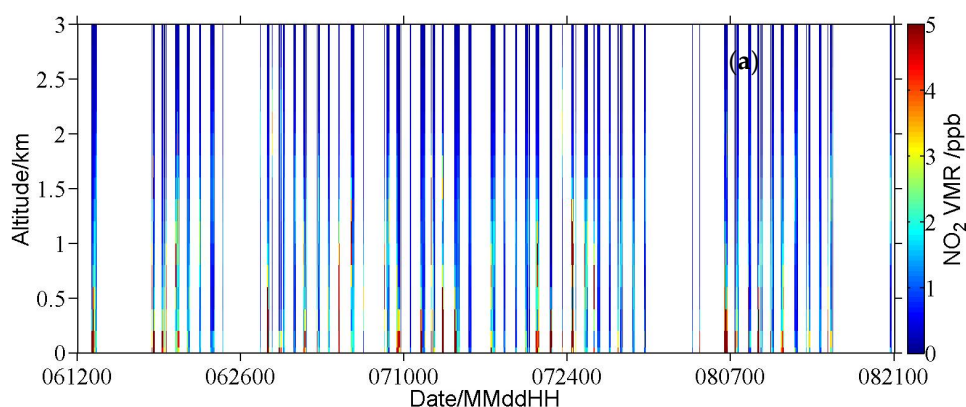

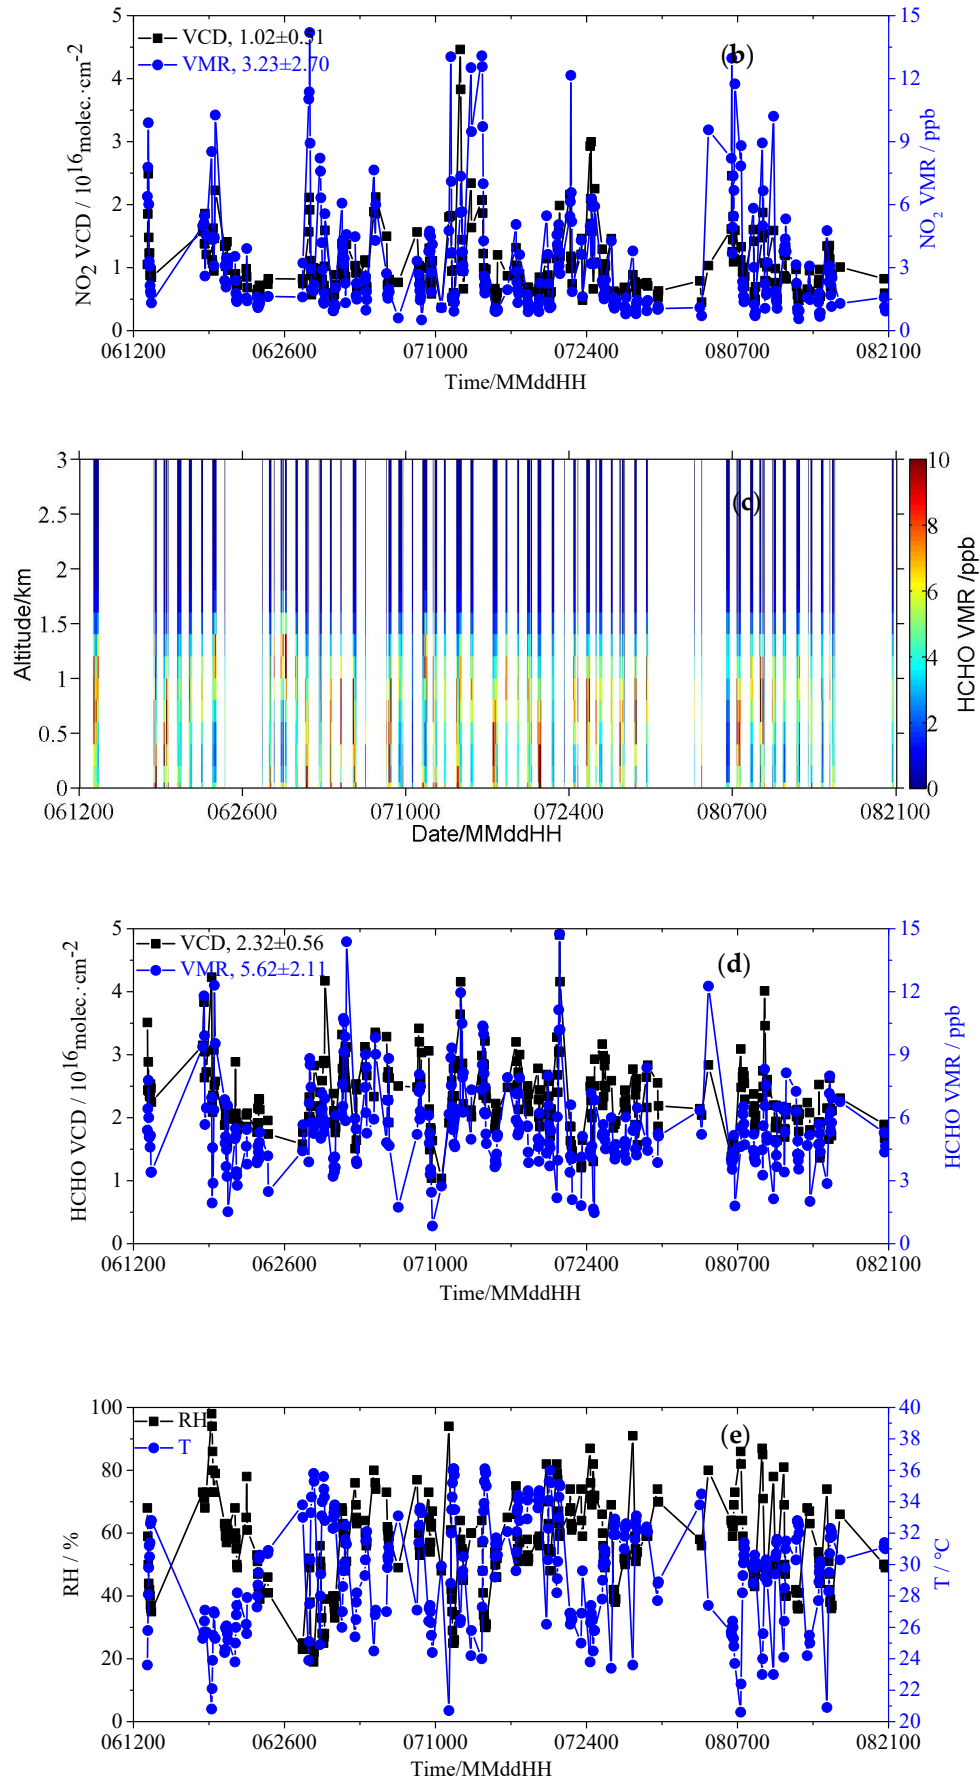

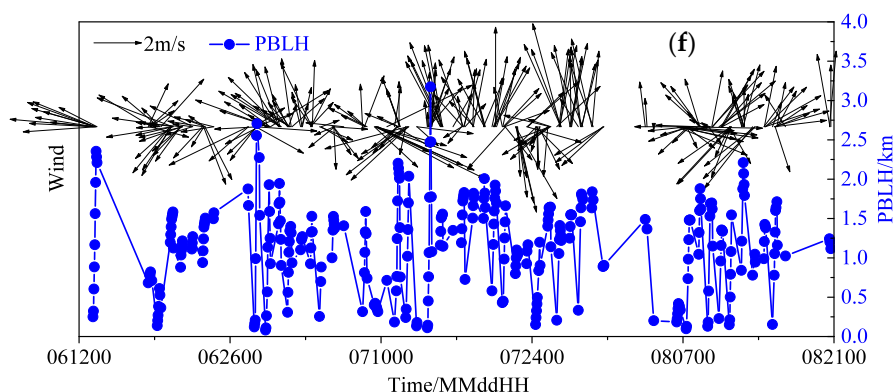

**Figure S1.** Time series of the qualified hourly  $\text{NO}_2$  and HCHO as well as coincident meteorological conditions. (a) Vertical profiles of  $\text{NO}_2$  volume mixing ratio (VMR) derived from MAX-DOAS; (b)  $\text{NO}_2$  vertical column density (VCD, black curve with squares) and VMR (blue curve with dots) in the lowest layer; (e) In-situ surface relative humidity (RH) and temperature (T); (f) In-situ surface wind showed by vector arrow with a scale of 2m/s and the height of planetary boundary layer (PBLH) from linearly interpolated reanalysis data (<https://www.ecmwf.int/en/forecasts/datasets/reanalysis-datasets/era5>). The expressions in the figure (b) denote the ‘mean  $\pm$  standard deviation’ for  $\text{NO}_2$  VCDs (unit:  $10^{16} \text{ molec. cm}^{-2}$ ) and VMRs (unit: ppb). (c, d) are same as to (a, b) but for HCHO, respectively.

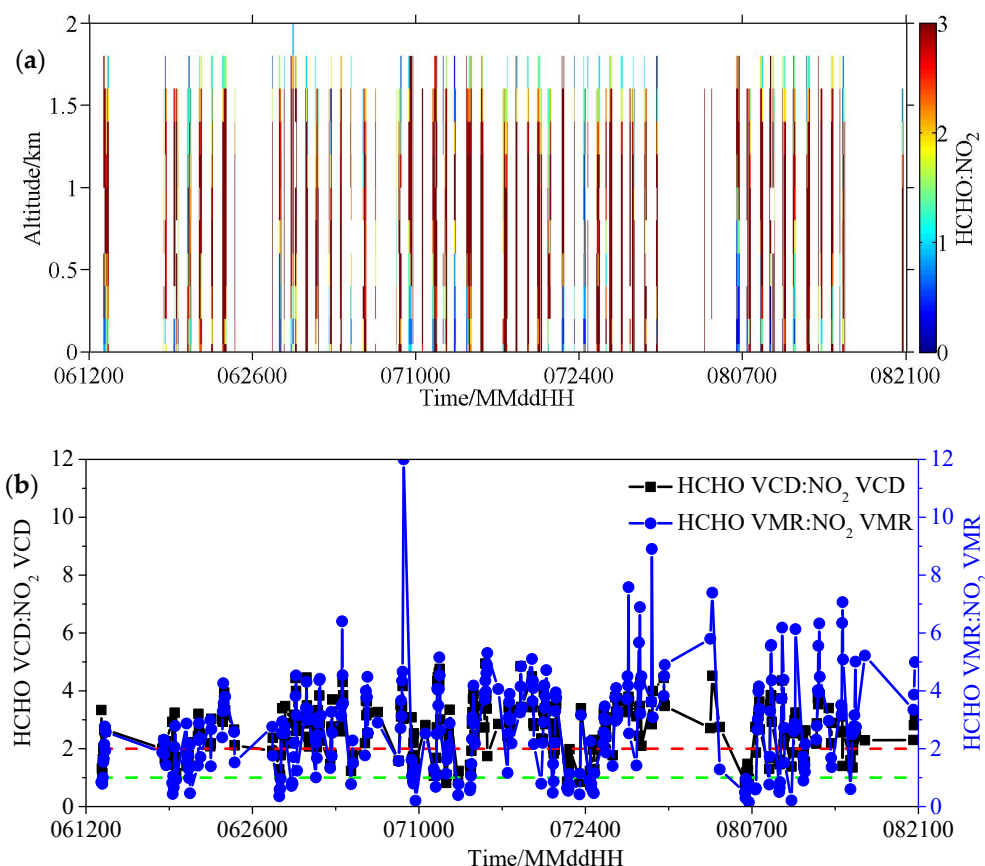

**Figure S2.** Time series for (a) vertical profiles of VMR ratios of HCHO to  $\text{NO}_2$  as well as (b) HCHO/ $\text{NO}_2$  ratios of VCD and near-surface VMR. Note that the color blocks are not shown in (a), once the HCHO VMRs less than 1ppb or larger than 10ppb. The 1:1 and 2:1 ratios of HCHO/ $\text{NO}_2$  are also shown by the color dash lines in (b).
